# Supplementary material for: VULCAN integrates ChIP-seq with patient-derived co-expression networks to identify GRHL2 as a key co-regulator of ERa at enhancers in breast cancer
Source: Genome Biol. 2019 May 13;20:91. doi: 10.1186/s13059-019-1698-z (PMC6515683; doi:10.1186/s13059-019-1698-z)
Supplement: Supplementary file 1 — Supplemental figures and tables. (PDF 3249 kb) [file 13059_2019_1698_MOESM1_ESM.pdf]

# Supplementary Figures

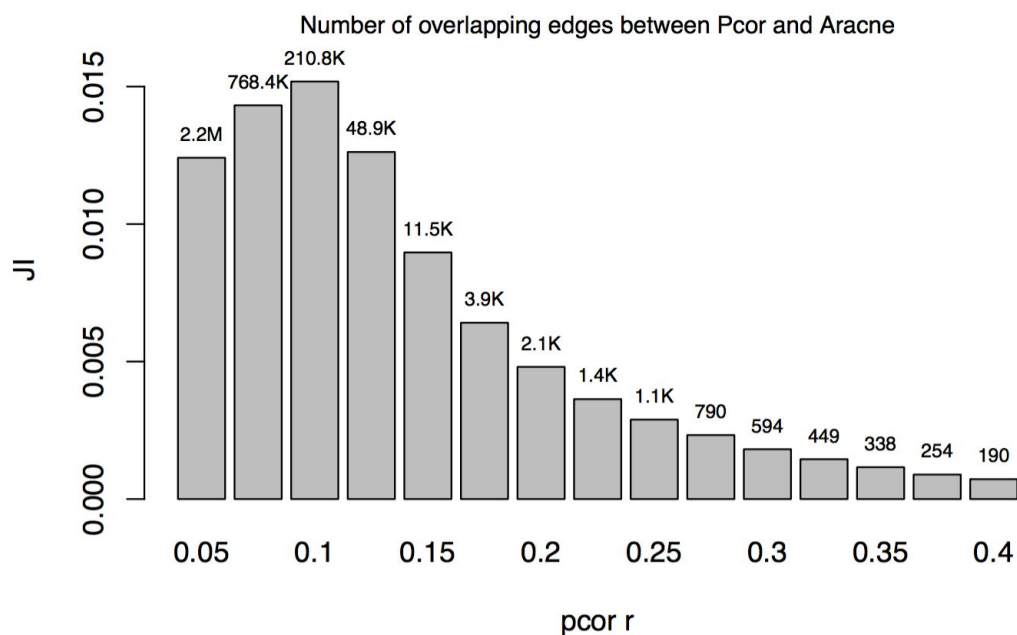

**Fig. S1:** Sheer number of overlapping edges at different Pcor thresholds.

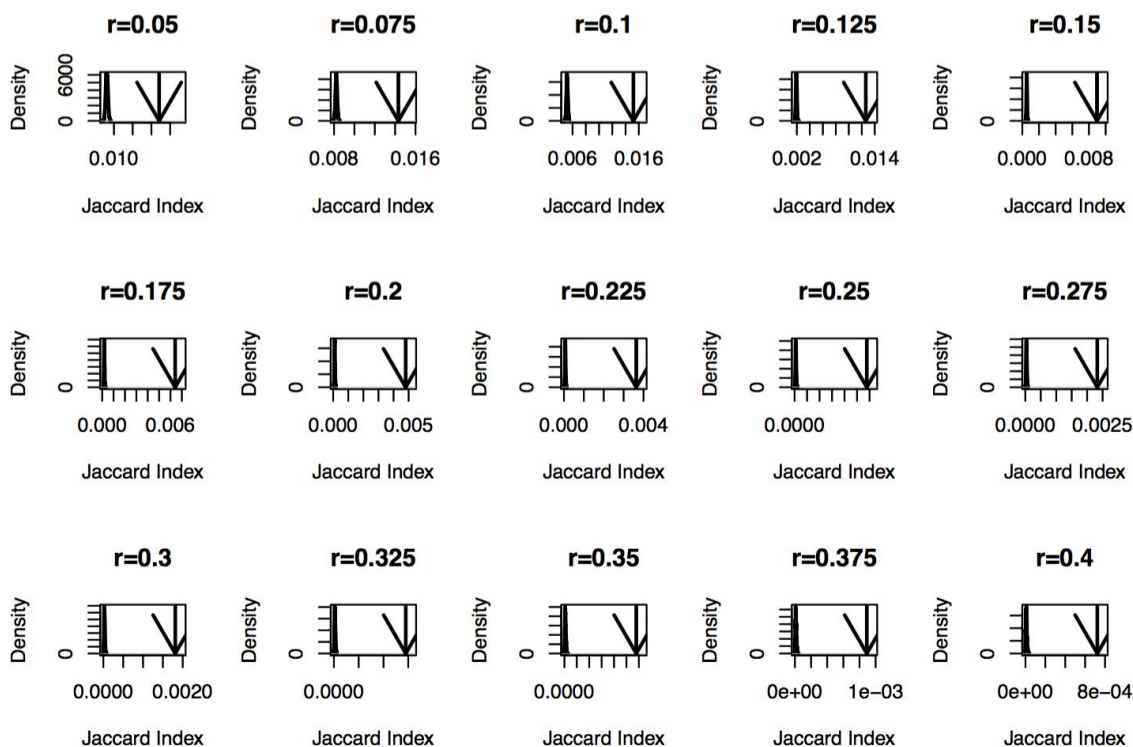

**Fig. S2:** Comparing the Jaccard Index between the ARACNe network and Partial Correlation networks (indicated as arrows) and Random networks (indicated as distributions).

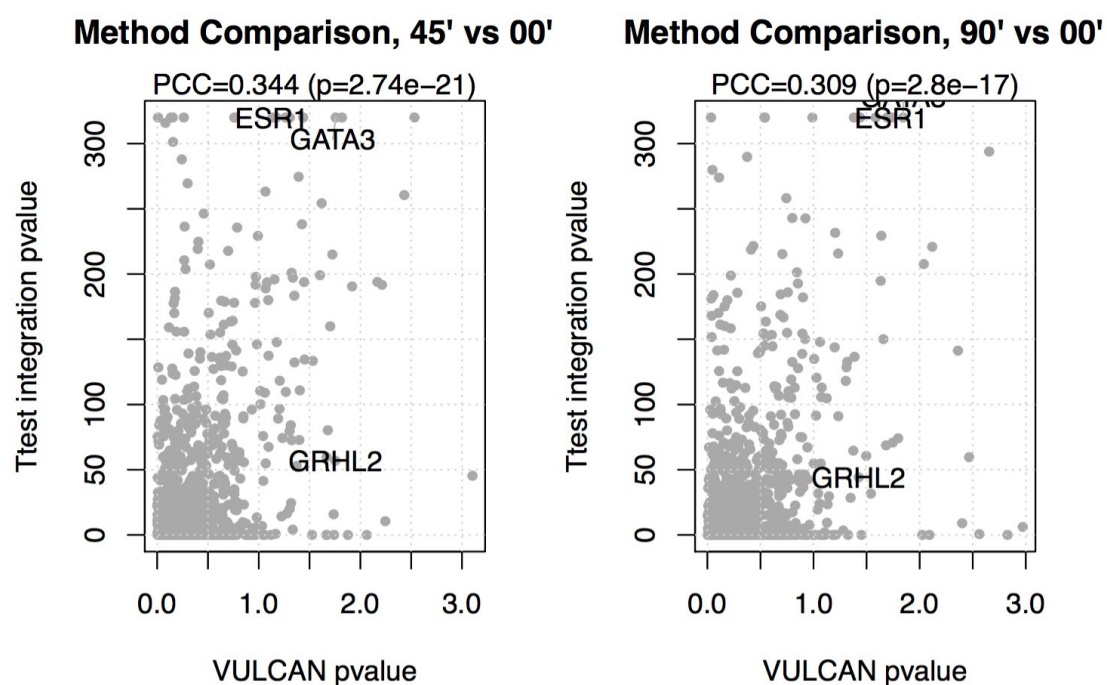

**Fig. S3: Comparison between VULCAN/VIPER and T-test integration.**

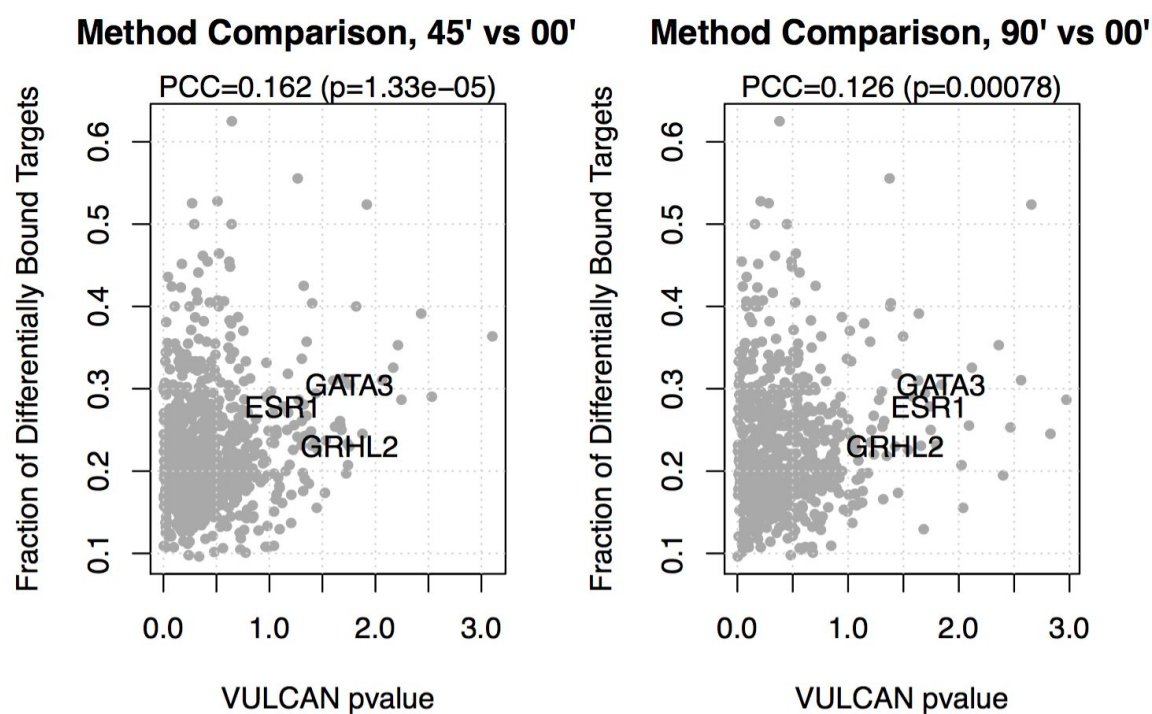

**Fig. S4: Comparison between VULCAN/VIPER and a fraction of targets found method.**

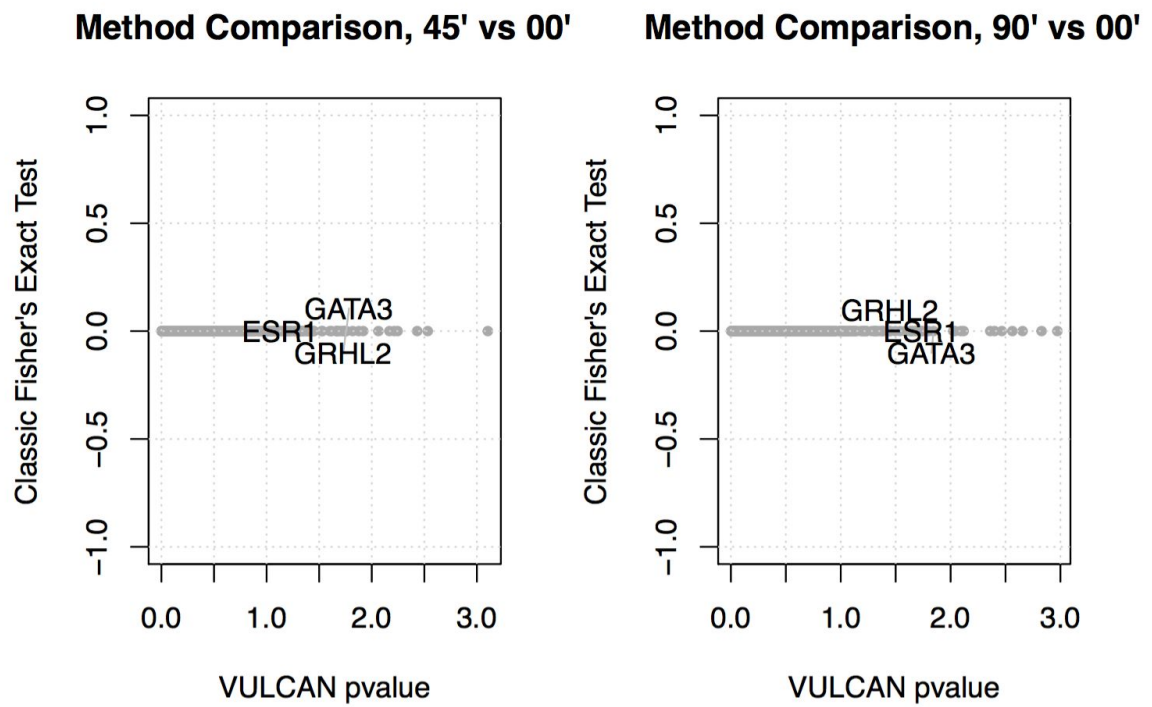

**Fig. S5: Comparison between VULCAN/VIPER and Fisher's Exact Test method.**

FET p-value:  $2.044\text{e-}29$

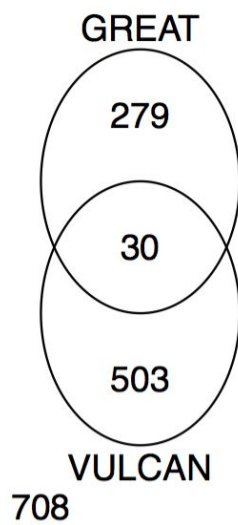

FET p-value:  $2.118\text{e-}28$

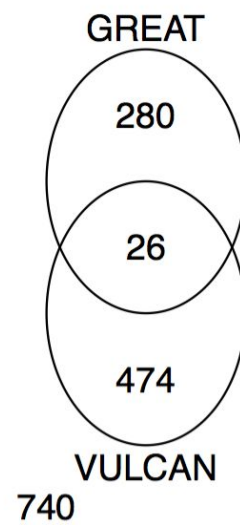

**Fig. S6: Comparison of results from the VULCAN and GREAT methods.**

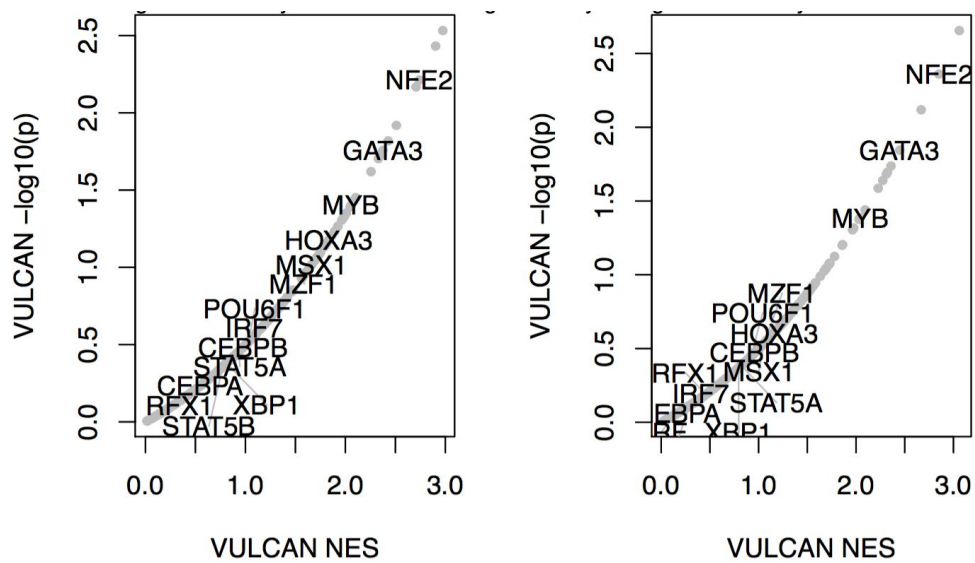

**Fig. S7: Comparison of results from the VULCAN and ChIP-enrich methods.**

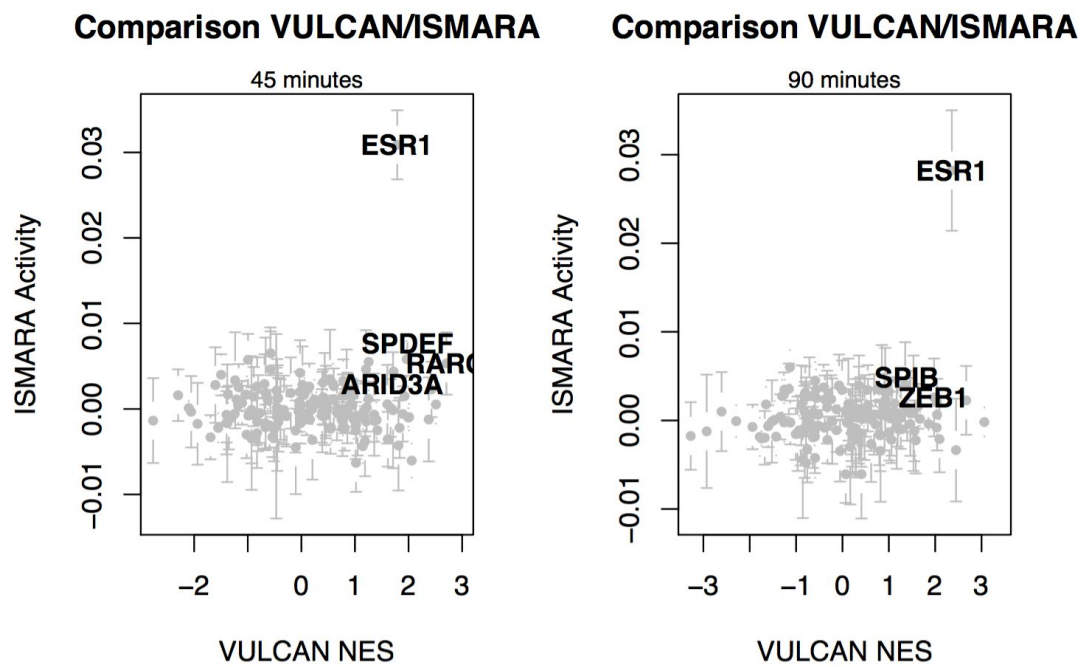

**Fig. S8: Comparison of results from the VULCAN and ISMARA methods.**

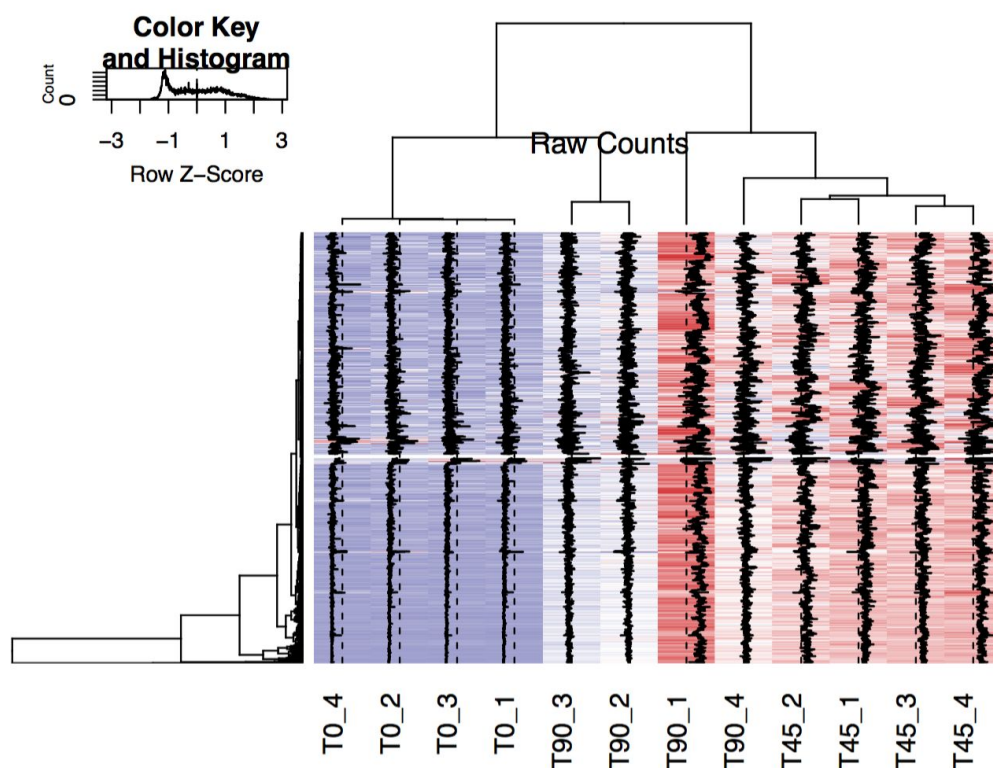

Fig. S9: Dataset clustering with Raw Counts.

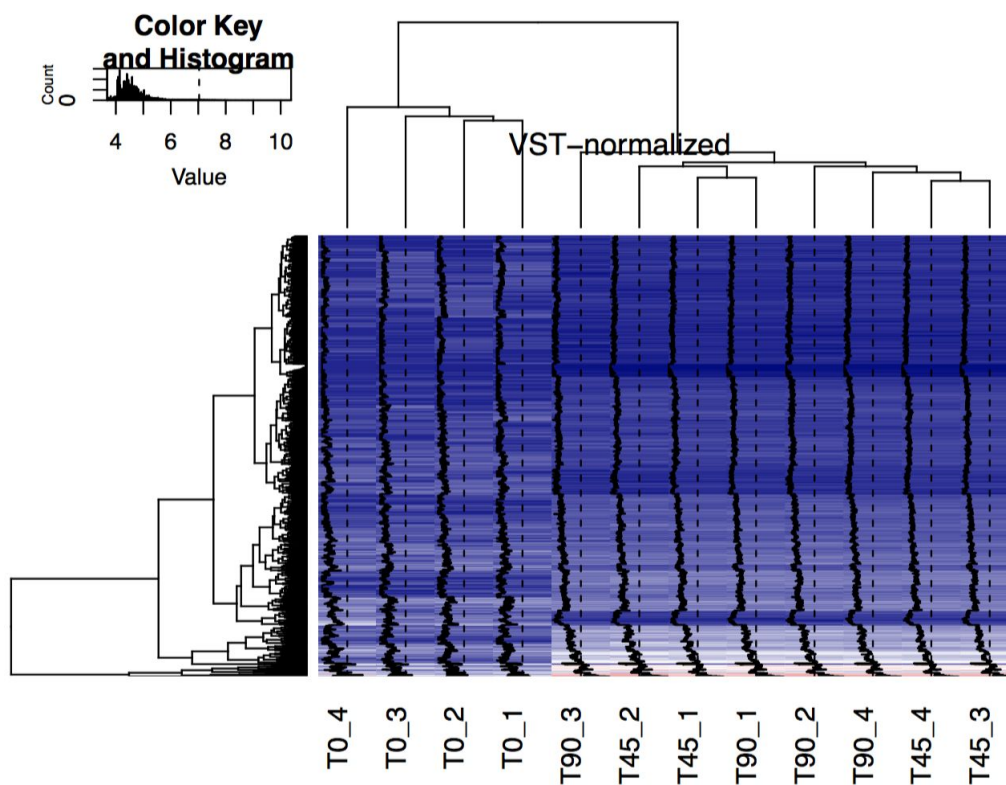

Fig. S10: Dataset clustering with VST-normalized Counts.



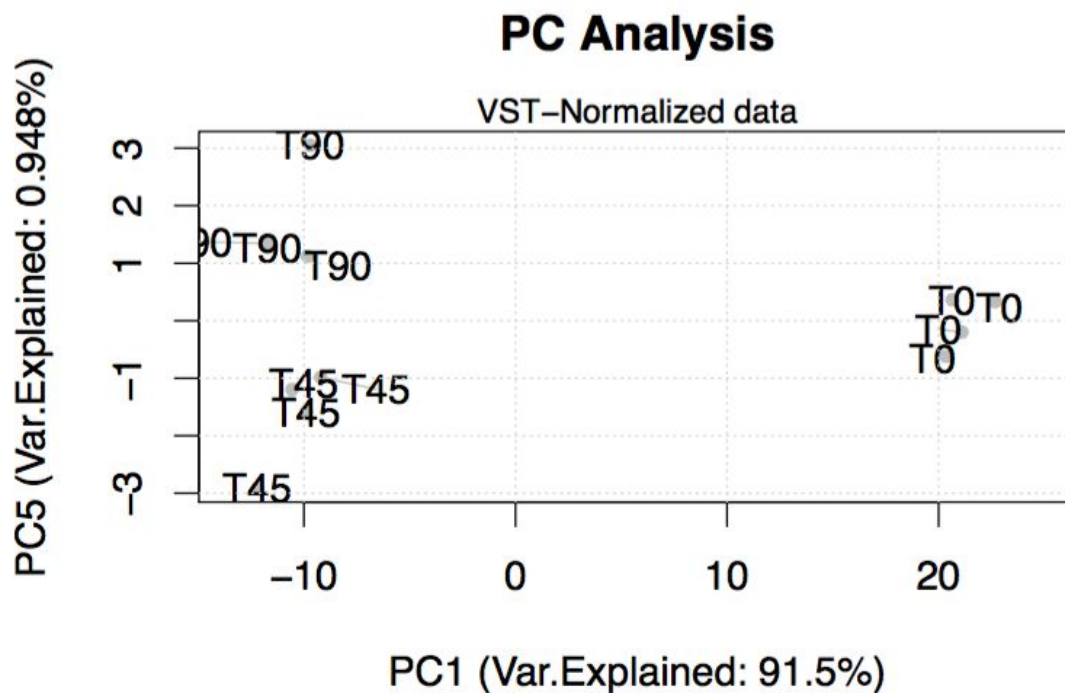

Fig. S13: Principal Component Analysis of the dataset, highlighting components 1 and 5.

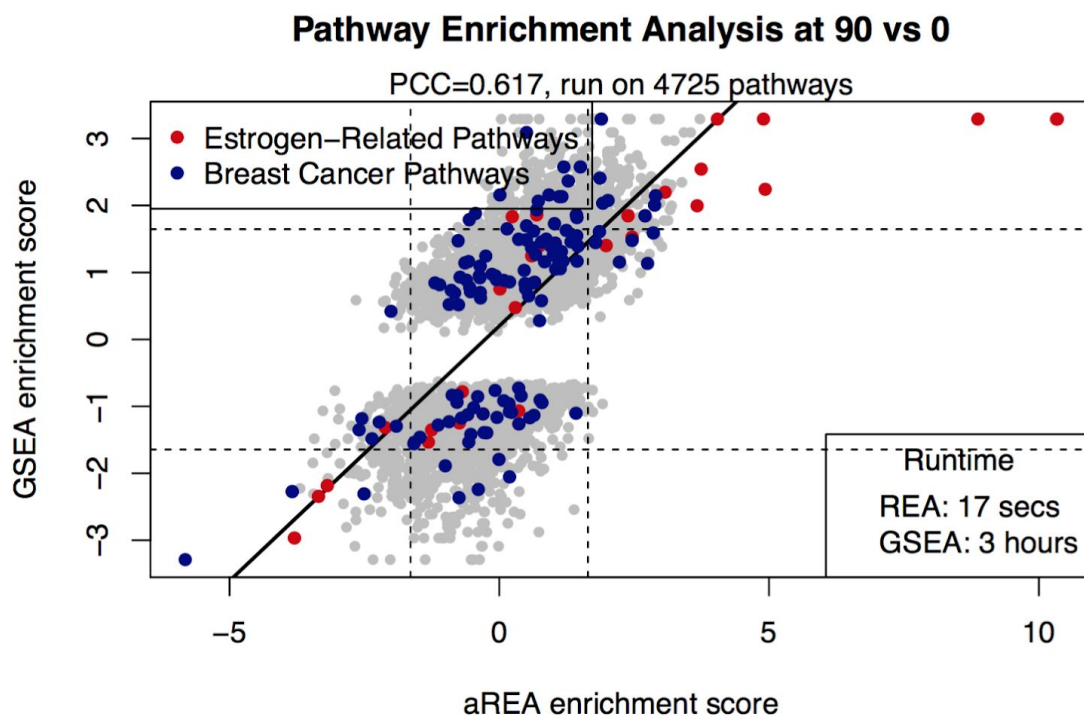

Fig. S14: Comparison of GSEA and aREA on a differential binding signature.

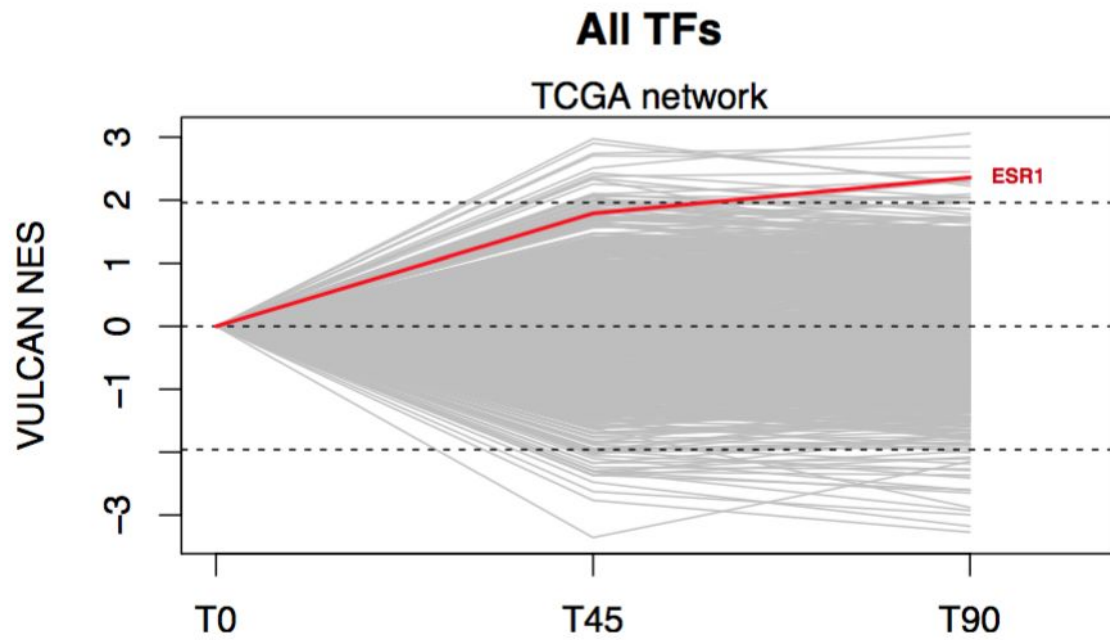

Fig. S15: Global TF activity after Estradiol Treatment in MCF7 cells, inferred using the TCGA network, highlighting the ESR1 TF as an example.

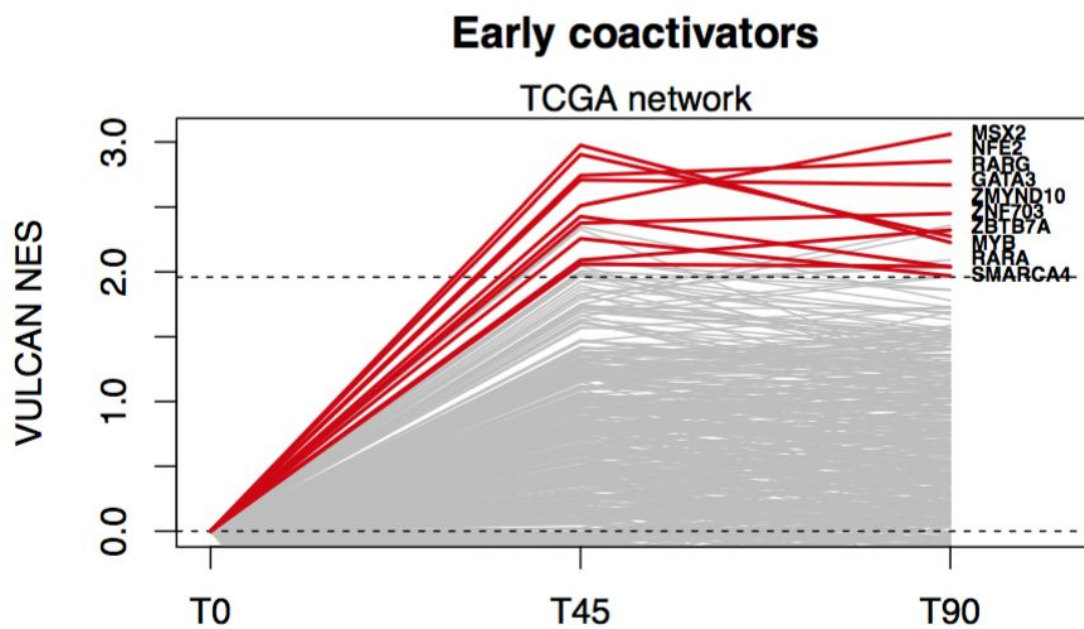

Fig. S16: Global TF activity after Estradiol Treatment in MCF7 cells, inferred using the TCGA network, highlighting TFs significantly upregulated at 45 minutes and 90 minutes.

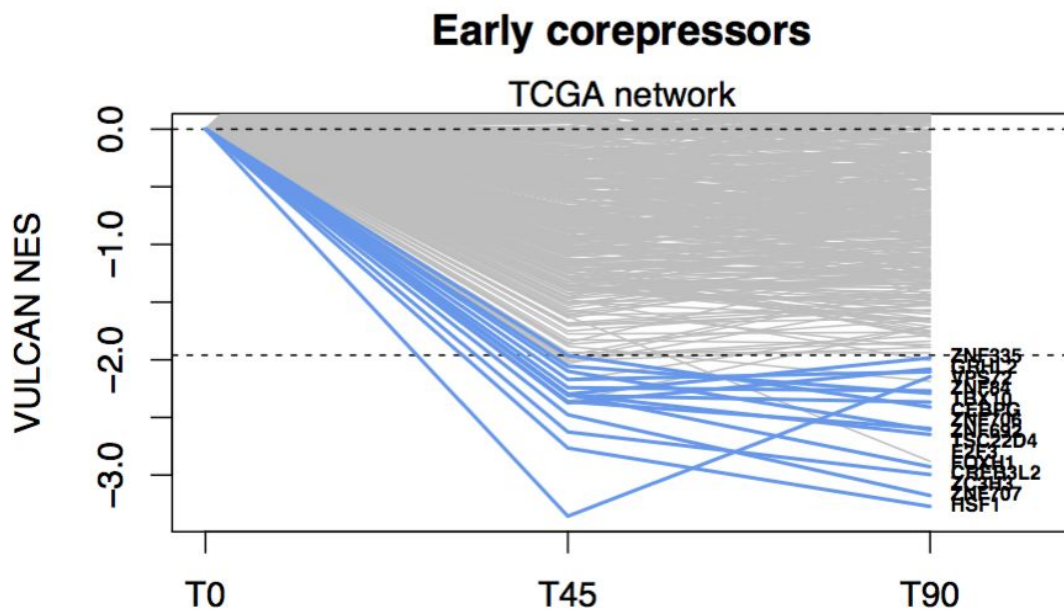

Fig. S17: Global TF activity after Estradiol Treatment in MCF7 cells, inferred using the TCGA network, highlighting TFs significantly downregulated at 45 minutes and 90 minutes.

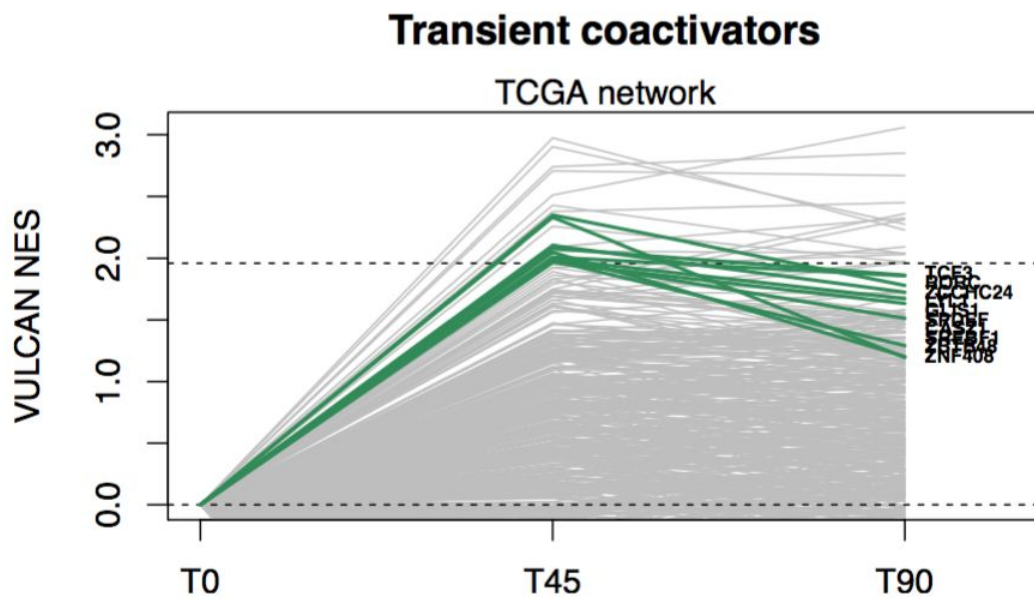

Fig. S18: Global TF activity after Estradiol Treatment in MCF7 cells, inferred using the TCGA network, highlighting TFs significantly upregulated at 45 minutes but not at 90 minutes.

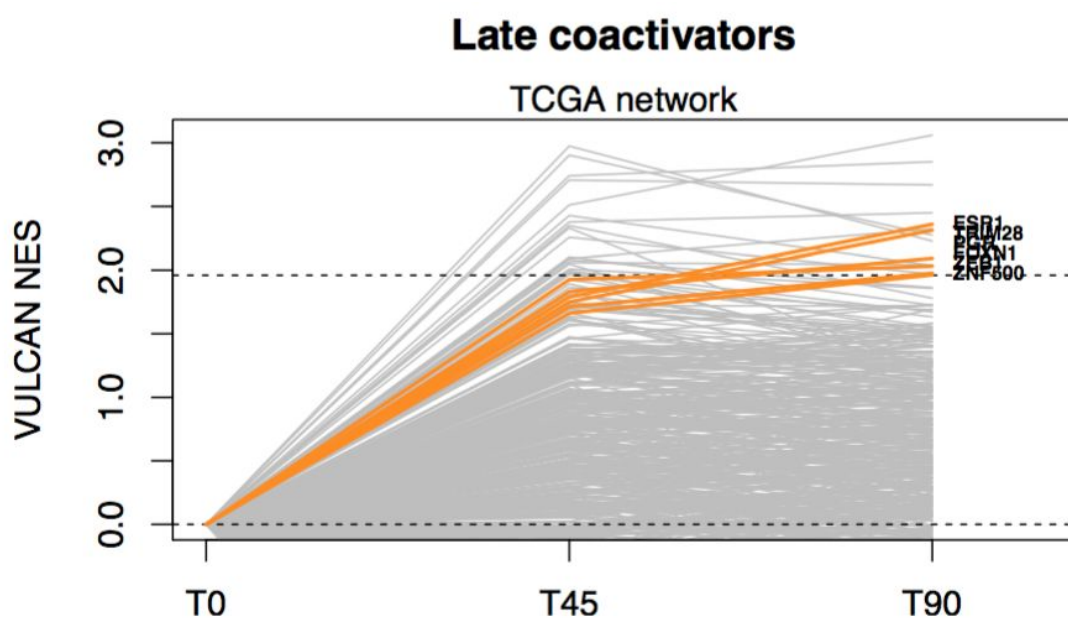

**Fig. S19:** Global TF activity after Estradiol Treatment in MCF7 cells, inferred using the TCGA network, highlighting TFs significantly upregulated at 90 minutes but not at 45 minutes.

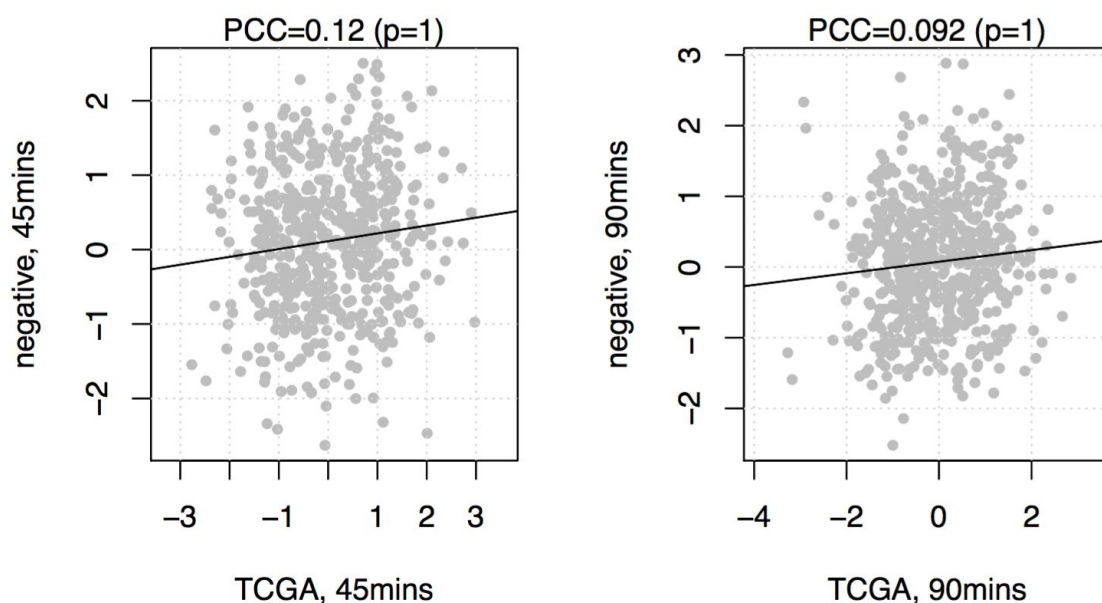

**Fig. S20:** Comparison between activities inferred through a breast cancer TCGA dataset and the AML dataset. PCC indicates the Pearson Correlation Coefficient.

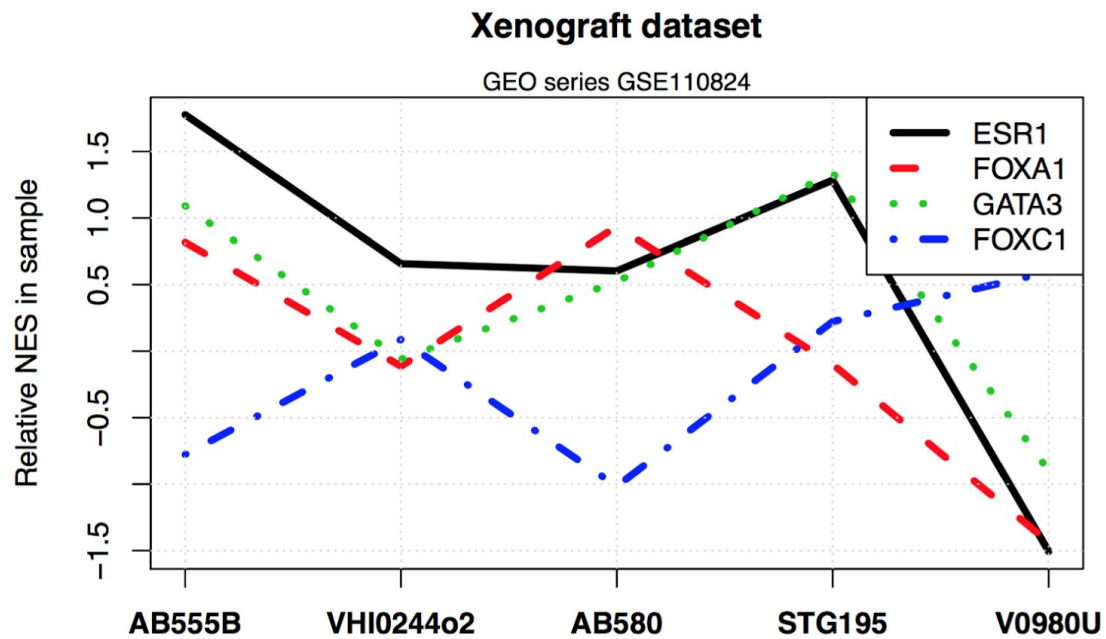

Fig. S21: VULCAN Activity scores for a few TFs extracted from the ER-targeted ChIP-Seq Xenograft (dataset GSE110824).

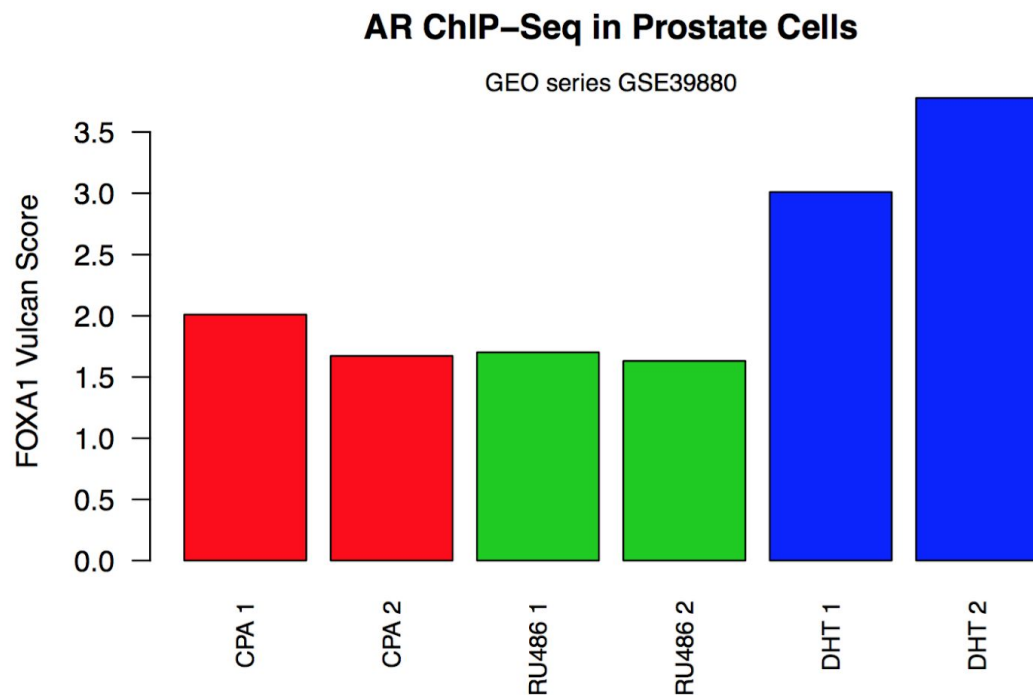

Fig. S22: VULCAN Activity scores for FOXA1 in Prostate cell lines (dataset GSE39880).

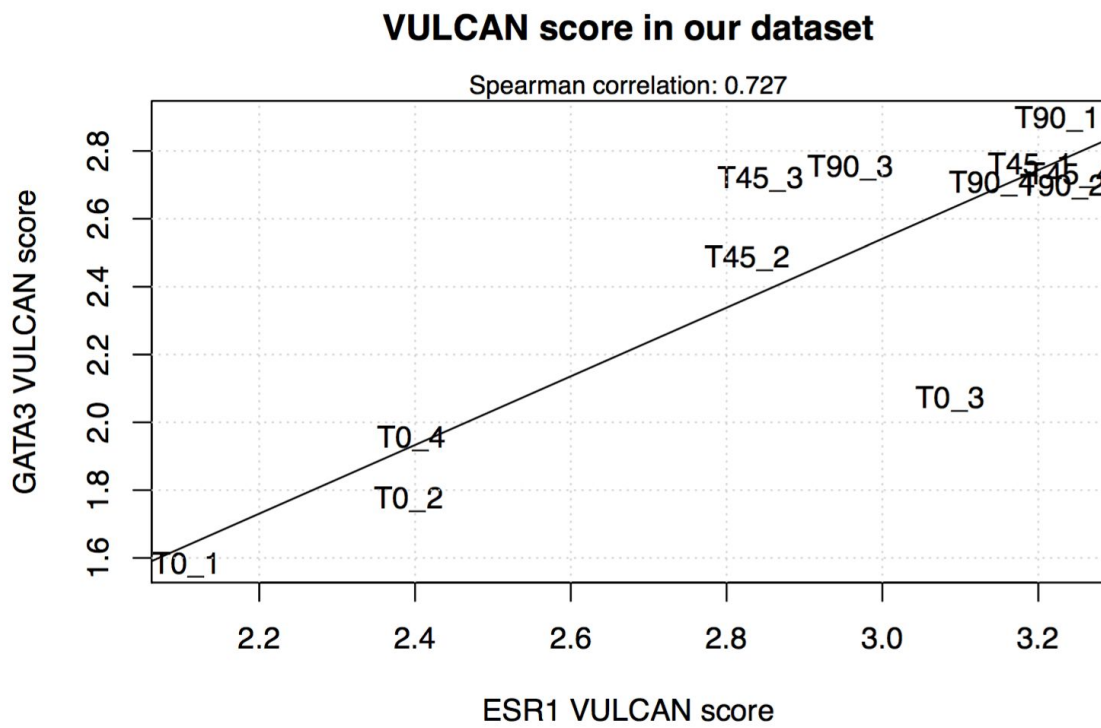

**Fig. S23: VULCAN scores of GATA3 and ESR1 in our dataset. Individual samples are indicated.**

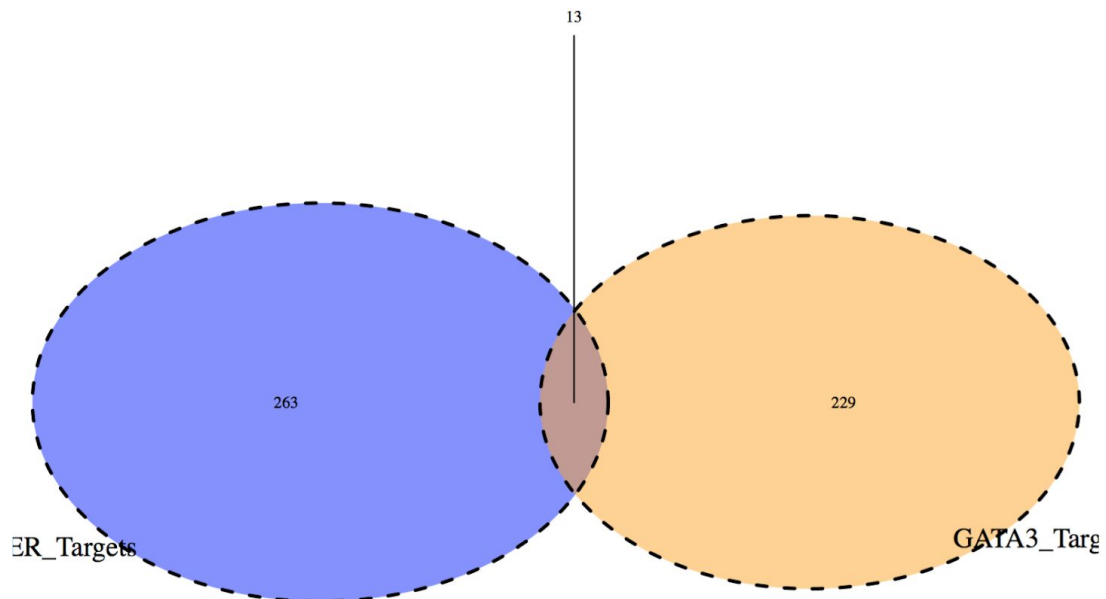

**Fig. S24: Example of target intersection between GATA3 and ER according to the MSigDB database of canonical TF-specific motifs in putative target gene promoters.**

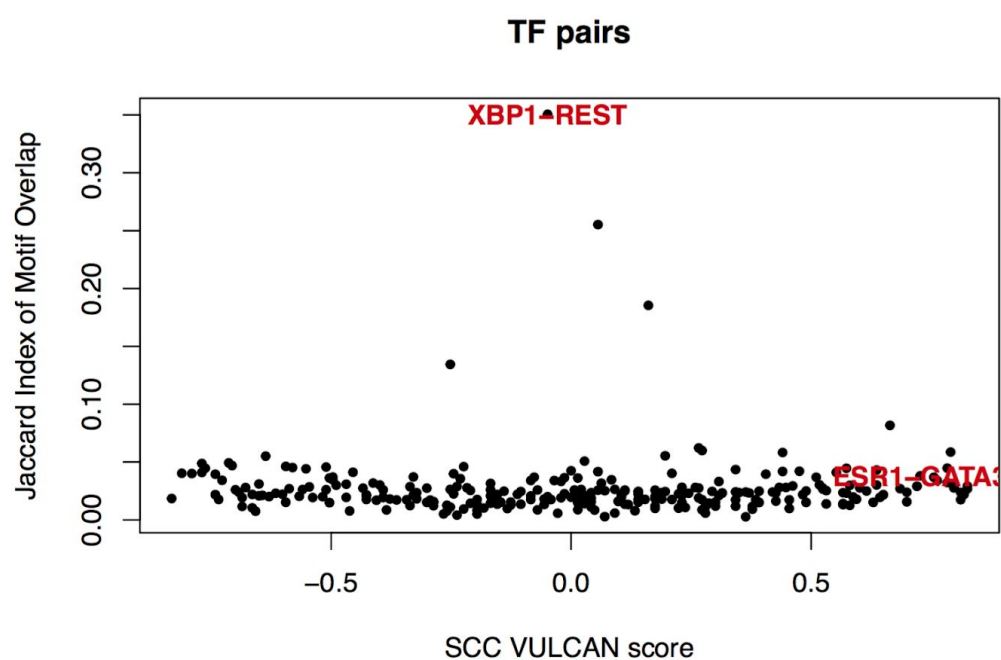

**Fig. S25: TF pairs compared in terms of VULCAN score Spearman Correlation Coefficient in our ER dataset and in terms of Jaccard Index of motif-based target intersection according to the MSigDB C3 collection.**

### Correlation between GRHL2 and ESR1 expression in METABRIC

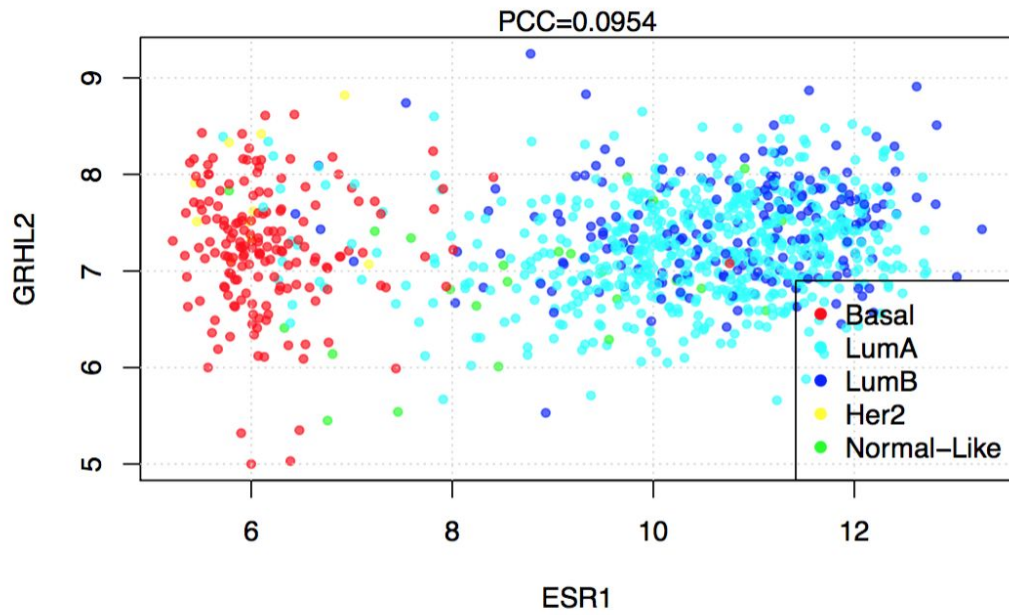

### Correlation between GRHL2 and ESR1 expression in TCGA

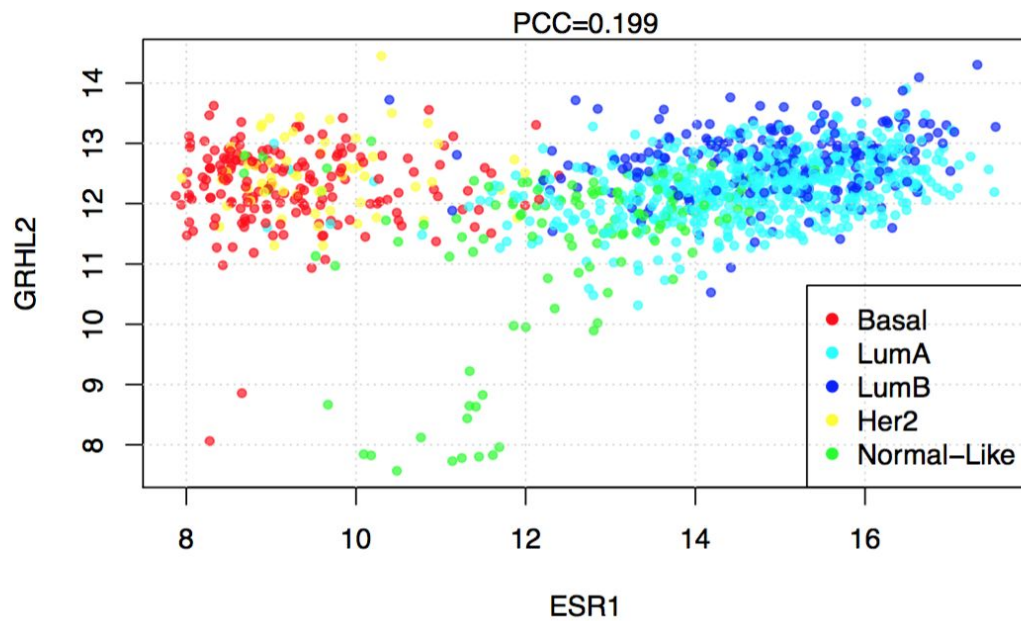

Fig. S26: Correlation between GRHL2 and ESR1 expression in the TCGA & METABRIC breast cancer datasets.

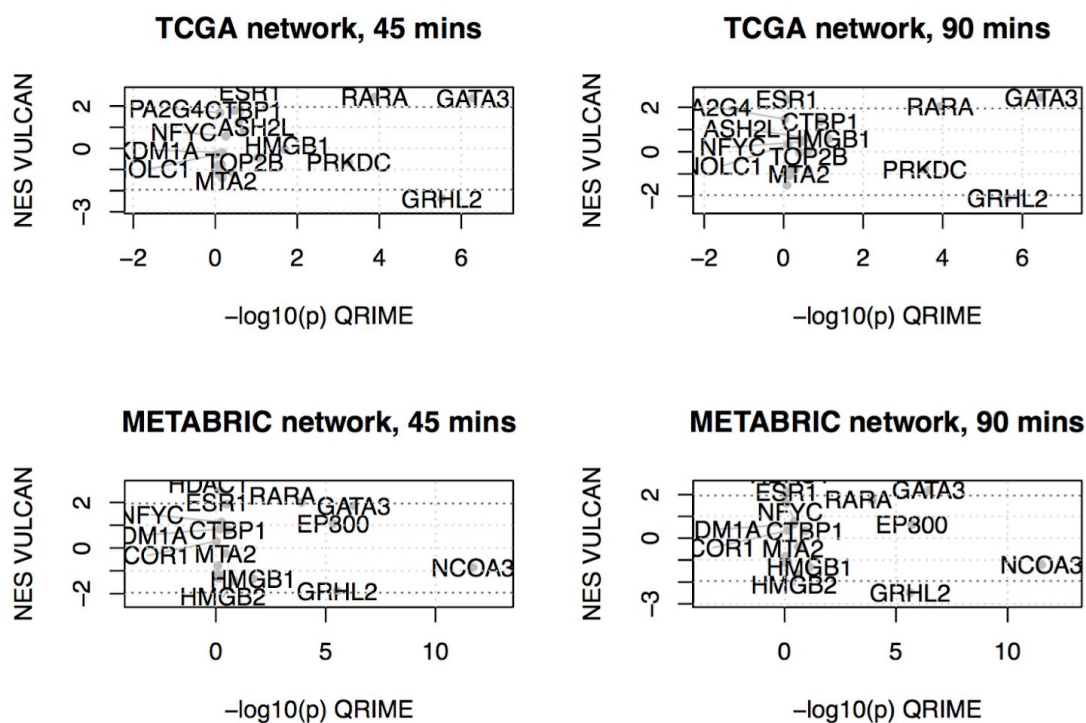

**Fig. S27: Comparison of Normalized Enrichment Score between the QRIME method (x-axis) and the VULCAN method (y-axis) at two time points using two regulatory networks for VULCAN**

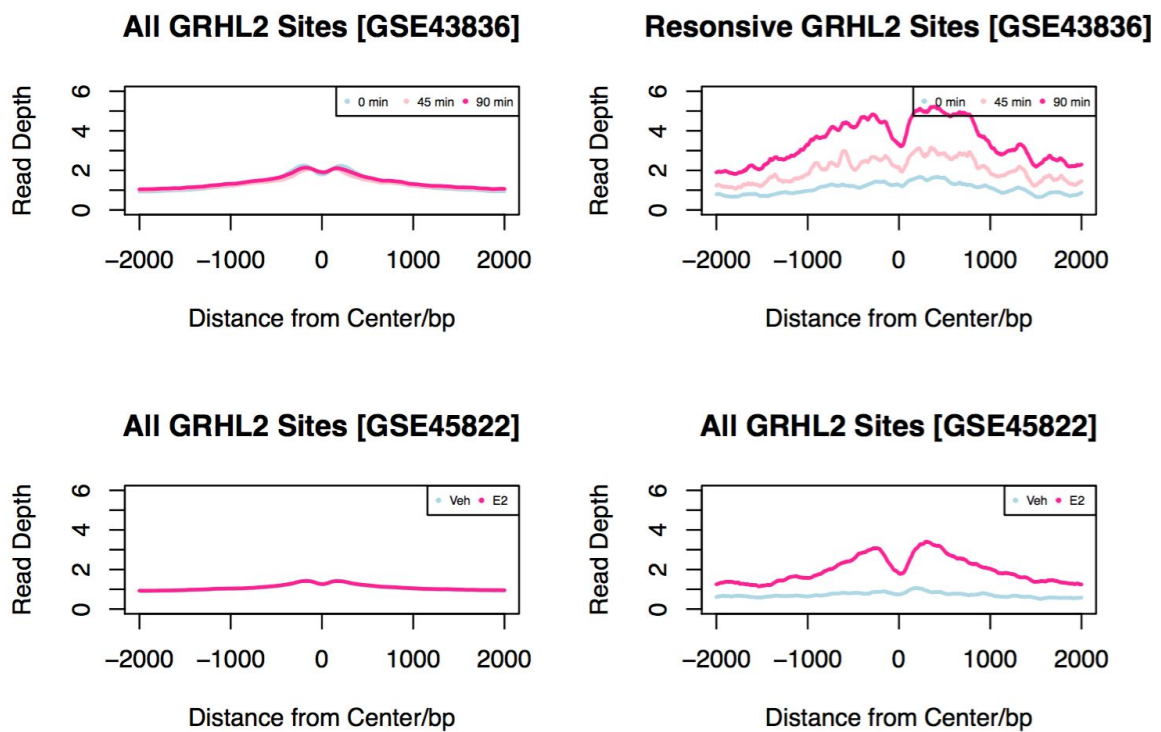

**Fig. S28:** Analysis of GRHL2 sites of Gro-Seq data from GSE43836 and GSE45822 both showed that E2 responsive GRHL2 responsive sites are transcriptionally responsive to E2.

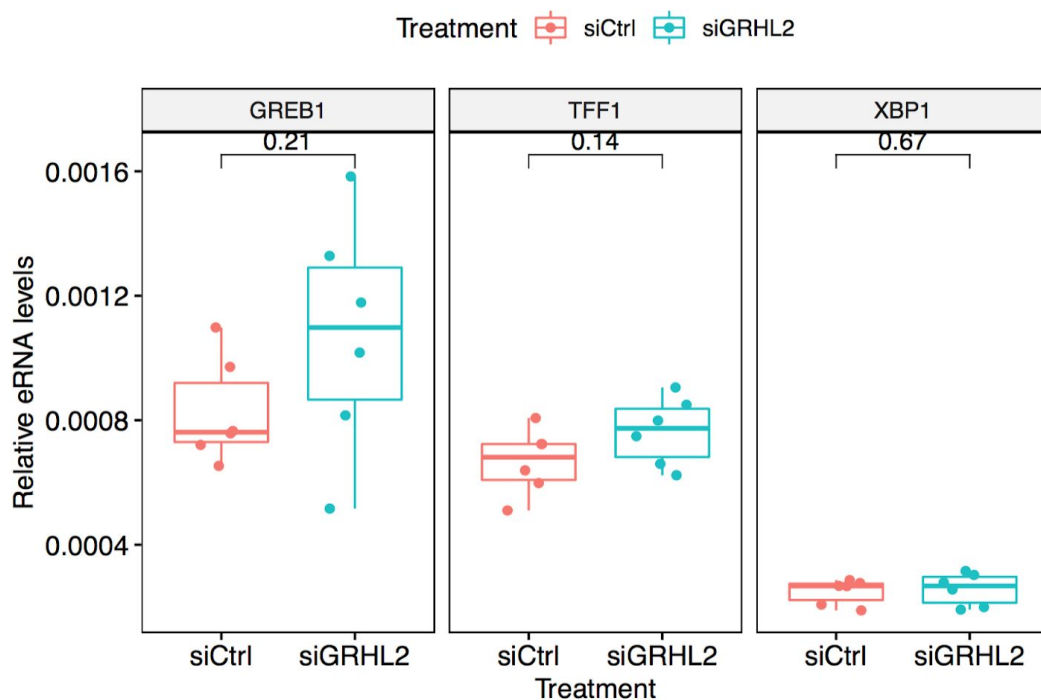

**Fig. S29:** Effect of knockdown of GRHL2 on eRNA at E2 responsive binding sites.

## Supplementary Tables

|                                                      | NES, 90' vs 0' | pvalue  |
|------------------------------------------------------|----------------|---------|
| <i>Bhat esr1 targets not via akt1 up</i>             | 10.3           | 4.6e-25 |
| <i>Bhat esr1 targets via akt1 up</i>                 | 10.3           | 5.3e-25 |
| <i>Dutertre estradiol response 6hr up</i>            | 8.87           | 7.1e-19 |
| <i>Frasor response to estradiol up</i>               | 4.93           | 8.3e-07 |
| <i>Dutertre estradiol response 24hr up</i>           | 4.9            | 9.7e-07 |
| <i>Stein esr1 targets</i>                            | 4.04           | 5.3e-05 |
| <i>Stein esrra targets responsive to estrogen dn</i> | 3.74           | 0.00018 |
| <i>Creighton endocrine therapy resistance 1</i>      | 3.72           | 2e-04   |
| <i>Stossi response to estradiol</i>                  | 3.67           | 0.00024 |
| <i>Zwang egf interval dn</i>                         | 3.55           | 0.00039 |
| <i>Creighton endocrine therapy resistance 4</i>      | 3.42           | 0.00062 |
| <i>Pedrioli mir31 targets up</i>                     | 3.38           | 0.00071 |
| <i>Massarweh tamoxifen resistance dn</i>             | 3.24           | 0.0012  |
| <i>Lein pons markers</i>                             | 3.19           | 0.0014  |
| <i>Reactome hs gag degradation</i>                   | 3.19           | 0.0014  |
| <i>Jiang tip30 targets dn</i>                        | 3.17           | 0.0015  |
| <i>Kegg glycerophospholipid metabolism</i>           | 3.16           | 0.0016  |
| <i>Geserick tert targets dn</i>                      | 3.13           | 0.0018  |
| <i>Gross hypoxia via hif1a dn</i>                    | 3.09           | 0.002   |
| <i>Valk aml cluster 6</i>                            | 3.09           | 0.002   |

**Table S1: aREA results: upregulated MsigDB pathways at 90mins.**

|                                                       | NES, 45' vs 0' | pvalue  |
|-------------------------------------------------------|----------------|---------|
| <i>Bhat esr1 targets via akt1 up</i>                  | 10.8           | 3e-27   |
| <i>Bhat esr1 targets not via akt1 up</i>              | 10.4           | 2.8e-25 |
| <i>Dutertre estradiol response 6hr up</i>             | 8.1            | 5.5e-16 |
| <i>Frasor response to estradiol up</i>                | 4.54           | 5.6e-06 |
| <i>Stein esrra targets responsive to estrogen dn</i>  | 4.21           | 2.6e-05 |
| <i>Dutertre estradiol response 24hr up</i>            | 4.15           | 3.4e-05 |
| <i>Stein esr1 targets</i>                             | 4.03           | 5.6e-05 |
| <i>Vantveer breast cancer esr1 up</i>                 | 3.84           | 0.00012 |
| <i>Geserick tert targets dn</i>                       | 3.69           | 0.00022 |
| <i>Pedrioli mir31 targets up</i>                      | 3.61           | 3e-04   |
| <i>Reactome glycerophospholipid biosynthesis</i>      | 3.39           | 0.00069 |
| <i>Zwang egf interval dn</i>                          | 3.38           | 0.00072 |
| <i>Naba ecm affiliated</i>                            | 3.31           | 0.00093 |
| <i>Stossi response to estradiol</i>                   | 3.29           | 0.00099 |
| <i>Lien breast carcinoma metaplastic vs ductal dn</i> | 3.25           | 0.0011  |
| <i>Kegg glycerophospholipid metabolism</i>            | 3.25           | 0.0012  |
| <i>Creighton endocrine therapy resistance 1</i>       | 3.24           | 0.0012  |
| <i>Reactome hs gag degradation</i>                    | 3.21           | 0.0013  |
| <i>Valk aml cluster 6</i>                             | 3.2            | 0.0014  |
| <i>Massarweh tamoxifen resistance dn</i>              | 3.1            | 0.0019  |

**Table S2: aREA results: upregulated MsigDBpathways at 45mins.**
